# Supplementary material for: Antifungal Activity of Natural Volatile Organic Compounds against Litchi Downy Blight Pathogen Peronophythora litchii
Source: MDPI journal article supplement (doi:10.3390/molecules23020358), 2018-02-08
Supplement: s1 [file s1]

## Supplementary material

### Antifungal activity of natural volatile organic compounds against litchi downy blight pathogen *Peronophythora litchii*

Mengyu Xing, Li Zheng, Yizhen Deng, Dandan Xu, Pinggen Xi, Minhui Li, Guanghui Kong and Zide Jiang\*

Department of Plant Pathology/Guangdong Province Key Laboratory of Microbial Signals and Disease Control, South China Agricultural University, Guangzhou 510642, China

\*Corresponding author      Zide Jiang

Complete postal address      Department of Plant Pathology/Guangdong Province Key Laboratory of Microbial Signals and Disease Control, South China Agricultural University, Wushan Road, No. 438, Tianhe District, Guangzhou 510642, China.

Phone number                      +86-020-38604779

E-mail address                    zdjiang@scau.edu.cn

Fax number                        +86-020-85280203

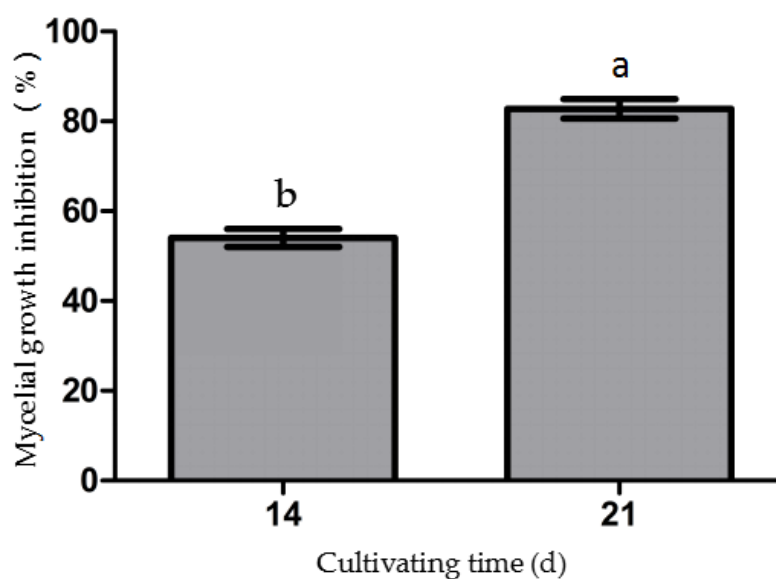

**Figure s1.** Suppression of *P. litchii* mycelial growth by volatiles from 14 d or 21 d culture of *S. fimicarius* BWL-H1. *P. litchii* was fumigated with 16 g/L of 14 d or 21 d wheat seeds culture with *S. fimicarius* BWL-H1. Mycelial growth inhibition was calculated according to the mycelial diameter cultured after 6 days at 25 °C. Mycelial growth inhibition fumigated with 21 d cultures and 14 d cultures was 82.8% and

54.1% respectively. Data are mean  $\pm$  SE of 27 replicates of three repetitions of the experiment. Values followed by different letters were significantly different ( $P<0.05$ ).
